# Supplementary material for: IFN-γ is a therapeutic target in paraneoplastic cerebellar degeneration
Source: JCI journal article supplement (doi:10.1172/jci.insight.127001), 2019-04-03
Supplement: sd1 [file 1]

## Supplementary figures

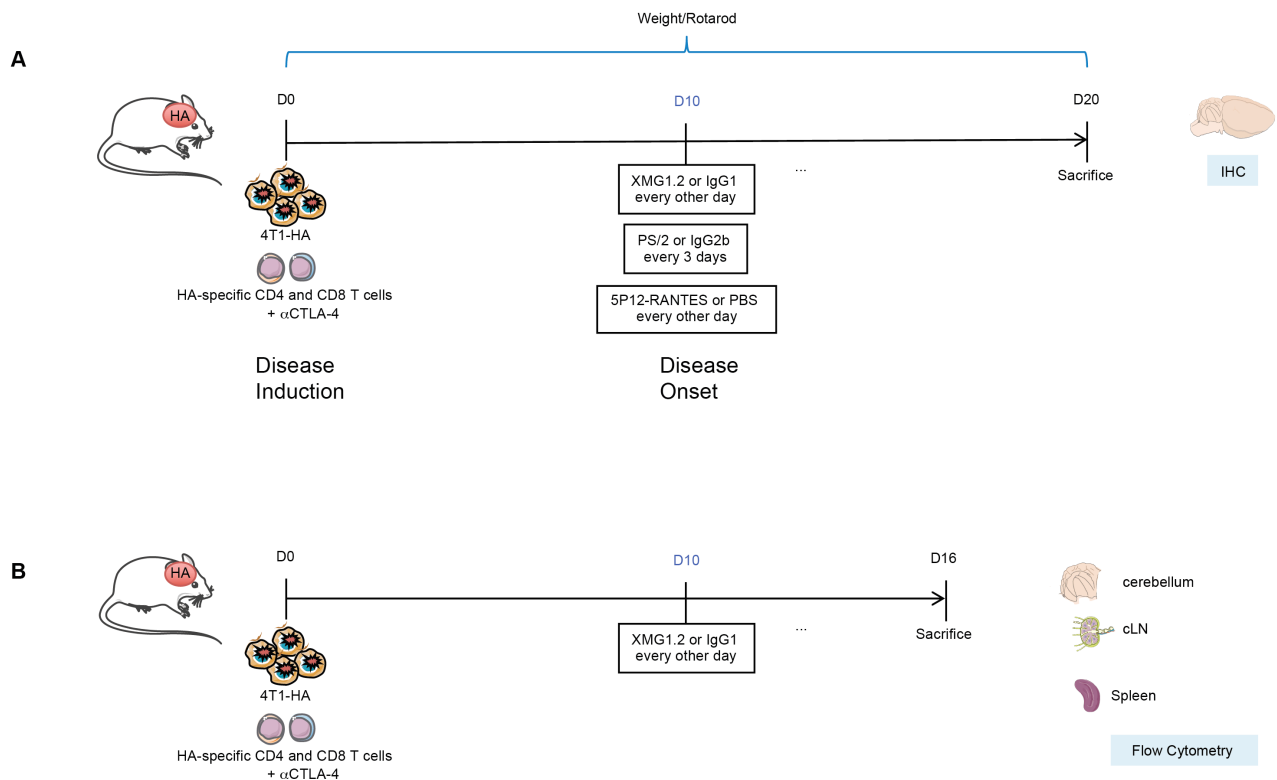

### Suppl. Fig 1. PCD induction and treatment scheme.

Naïve HA-specific CD4 and CD8 T cells were isolated from TCR-transgenic mice, and transferred i.v. into L7-HA or WT littermates on day 0 (disease induction), together with the simultaneous s.c. implantation of 4T1-HA tumor cells and anti-CTLA-4 mAb injection. On day 10 (clinical onset of neurological disease), mice were treated with mAbs blocking  $\alpha$ 4 integrin (PS/2) or neutralizing IFN $\gamma$  (XMG1.2) or with a CCR5 antagonist (5P12-RANTES), or their respective controls. Mice were followed clinically daily and sacrificed for histological analysis at day 20 (a) or at the peak of disease (day 16) for characterization of cerebellum-infiltrating cells by flow cytometry (b).

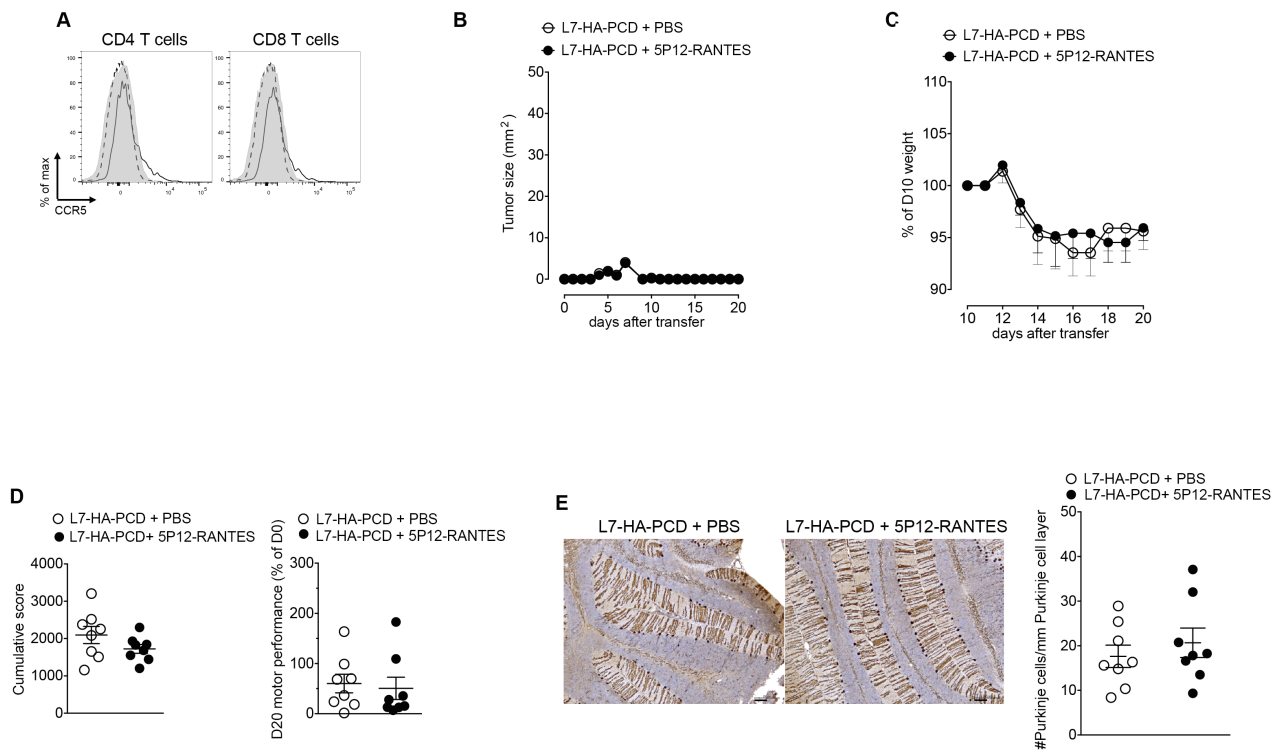

**Suppl. Fig 2. Blockade of the CCR5 chemokine receptor is ineffective to treat ongoing PCD.**  
**a.** Evaluation by flow cytometry of CCR5 expression on CD4 and CD8 T cells from different organs of L7-HA-PCD mice at day 16. Dotted line: spleen, grey: cLN, and solid line: cerebellum. **b.** Tumor size, **c.** mouse weight, **d.** rotarod performance, and **e.** Purkinje cell density from L7-HA-PCD mice treated with 5P12-RANTES or PBS from day 10, n = 8 per group. Bar = 100  $\mu$ m.

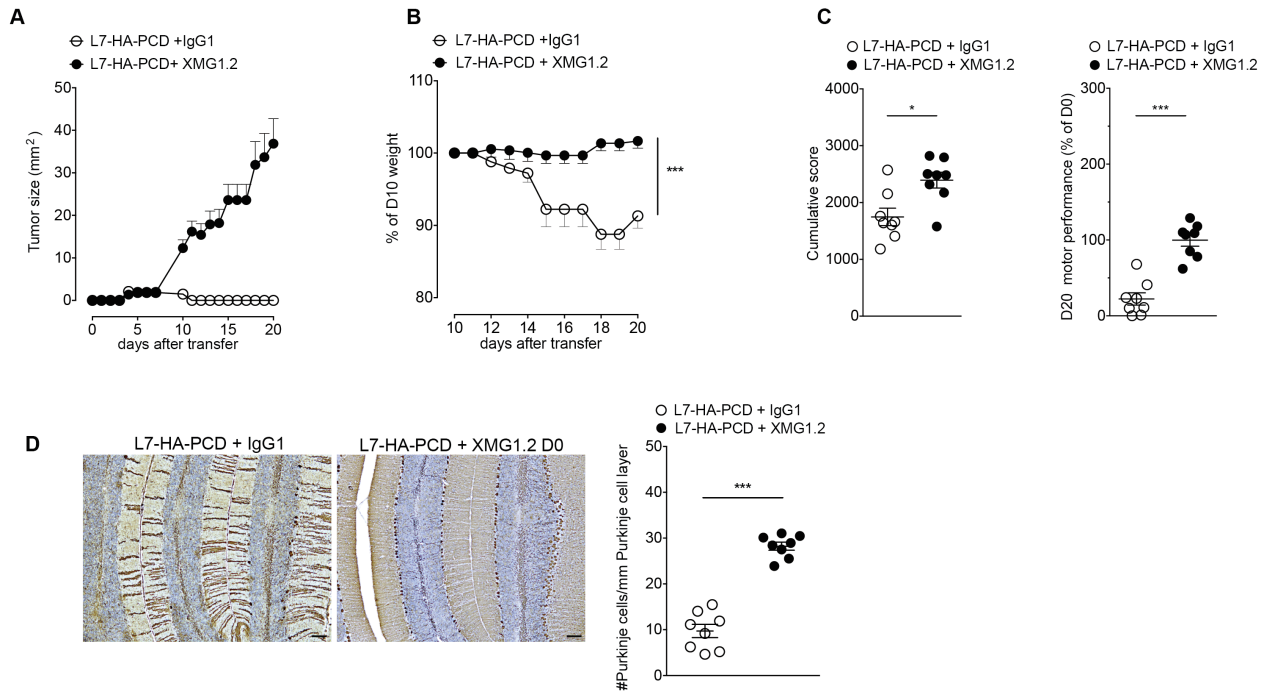

**Suppl. Fig 3. Absence of tumor control and lack of PCD development upon IFN $\gamma$  neutralization starting at day 0.**

**a.** Tumor size, **b.** mouse weight, **c.** rotarod assessment, and **d.** Purkinje cell density from L7-HA-PCD mice treated with XMG1.2 or IgG1 from day 0 onwards. Bar = 100  $\mu$ m. n=8 mice per group, Mann-Whitney U test, \*P<0.05; \*\*P<0.01; \*\*\*P<0.001.
